# Supplementary material for: Global economic valuation of organic agriculture
Source: Research Square preprint supplement (doi:10.21203/rs.3.rs-8408843/v1), 2026-01-19
Supplement: Supplementary file 1 [file e3ad712c0ef98714f3cbef85.pdf]

# Supporting information for “Global economic valuation of organic agriculture”

**Table S1.** Crops included in each FAO crop group.

| Crop group            | Included crops                                                                                                                                                                                                                                                                                                                                                                                                                                                                                                                                |
|-----------------------|-----------------------------------------------------------------------------------------------------------------------------------------------------------------------------------------------------------------------------------------------------------------------------------------------------------------------------------------------------------------------------------------------------------------------------------------------------------------------------------------------------------------------------------------------|
| Fruit & nuts          | Grapes, chestnuts (in shell), walnuts (in shell), blueberries, other nuts (excluding wild edible nuts and groundnuts), in shell, n.e.c., dates, avocados, apples, bananas, oranges, kiwi fruit, pistachios (in shell), pomelos and grapefruits, almonds (in shell), raspberries, hazelnuts (in shell), figs, strawberries, pineapples, cranberries, lemons and limes, apricots, pears, other stone fruits, peaches and nectarines, cherries, tangerines, mandarins, clementines, plums and sloes, currants, persimmons, quinces, gooseberries |
| Cereals               | Wheat, rice, maize (corn), barley, oats, cereals n.e.c., triticale, rye, buckwheat                                                                                                                                                                                                                                                                                                                                                                                                                                                            |
| Spices & stimulants   | Tea leaves, coffee (green), cocoa beans, hop cones                                                                                                                                                                                                                                                                                                                                                                                                                                                                                            |
| Oil crops             | Olives, soya beans, oil palm fruit, coconuts (in shell), sunflower seed, hempseed, rape or colza seed, other oil seeds, n.e.c., linseed, mustard seed                                                                                                                                                                                                                                                                                                                                                                                         |
| Vegetables            | Peas (green), cabbages                                                                                                                                                                                                                                                                                                                                                                                                                                                                                                                        |
| Edible roots & tubers | Potatoes                                                                                                                                                                                                                                                                                                                                                                                                                                                                                                                                      |
| Sugar crops           | Sugar cane, sugar beet                                                                                                                                                                                                                                                                                                                                                                                                                                                                                                                        |
| Pulses                | Lentils (dry), beans (dry), lupins                                                                                                                                                                                                                                                                                                                                                                                                                                                                                                            |

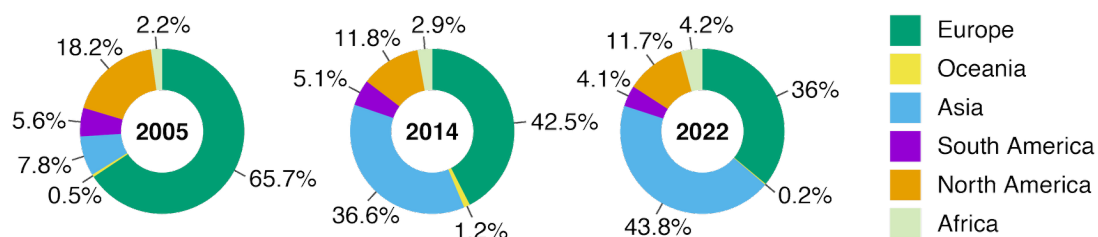

**Fig. S1.** Distribution of the total value of organic agriculture across continents and three time points (2005, 2014 and 2022).

**Table S2.** Organic (org) producer prices and yields relative to conventional (con) systems for individual crops.

| Crop          | Price           |           |     | Yield         |           |     |
|---------------|-----------------|-----------|-----|---------------|-----------|-----|
|               | Organic premium | 95% CI    | n   | Org:con yield | 95% CI    | n   |
| Grapes        | 1.08            | 0.99–1.17 | 22  | 0.83          | 0.72–0.96 | 7   |
| Wheat         | 1.14            | 0.96–1.32 | 22  | 0.65          | 0.58–0.74 | 163 |
| Apples        | 1.17            | 1.08–1.25 | 75  | 0.94          | 0.76–1.15 | 17  |
| Rice          | 1.37            | 1.23–1.51 | 130 | 0.72          | 0.50–1.05 | 10  |
| Soya beans    | 1.05            | 0.97–1.13 | 77  | 0.88          | 0.82–0.94 | 113 |
| Maize (corn)  | 1.28            | 1.12–1.44 | 55  | 0.80          | 0.74–0.87 | 222 |
| Coffee, green | 1.25            | 1.18–1.31 | 478 | 0.71          | 0.64–0.79 | 7   |
| Barley        | 1.97            | 0.78–3.17 | 17  | 0.65          | 0.56–0.75 | 94  |
| Potatoes      | 1.21            | 1.08–1.34 | 17  | 0.66          | 0.53–0.82 | 18  |
| Strawberries  | 1.15            | 1.00–1.29 | 29  | 0.94          | 0.63–1.42 | 16  |

**Table S3.** Share of the total value of each crop or crop group accounted for by the three countries with the highest values for that crop or crop group.

| Item                  | Countries with highest values (% of item total) |                     |                    |
|-----------------------|-------------------------------------------------|---------------------|--------------------|
|                       | 1st                                             | 2nd                 | 3rd                |
| <i>Crop groups</i>    |                                                 |                     |                    |
| All crops             | China (38%)                                     | France (13%)        | Italy (7%)         |
| Fruit & nuts          | France (25%)                                    | China (25%)         | United States (8%) |
| Cereals               | China (36%)                                     | France (9%)         | United States (8%) |
| Spices & stimulants   | China (76%)                                     | Peru (5%)           | Sierra Leone (3%)  |
| Oil crops             | Italy (36%)                                     | China (17%)         | Spain (8%)         |
| Vegetables            | Canada (24%)                                    | Germany (23%)       | Mexico (18%)       |
| Edible roots & tubers | Egypt (22%)                                     | Germany (20%)       | France (14%)       |
| Sugar crops           | Paraguay (24%)                                  | Colombia (18%)      | Germany (12%)      |
| Pulses                | Canada (57%)                                    | United States (27%) | Germany (6%)       |
| <i>Crops</i>          |                                                 |                     |                    |
| Grapes                | France (52%)                                    | Spain (12%)         | Italy (9%)         |
| Wheat                 | China (44%)                                     | France (11%)        | Italy (9%)         |
| Apples                | China (26%)                                     | United States (20%) | France (19%)       |
| Rice                  | China (63%)                                     | Thailand (14%)      | Pakistan (5%)      |
| Soya beans            | China (55%)                                     | United States (11%) | Canada (6%)        |
| Maize (corn)          | United States (43%)                             | France (15%)        | Ukraine (8%)       |
| Coffee                | Peru (34%)                                      | Colombia (20%)      | Honduras (10%)     |
| Barley                | France (18%)                                    | Germany (17%)       | Spain (12%)        |
| Potatoes              | Egypt (22%)                                     | Germany (20%)       | France (14%)       |
| Strawberries          | Mexico (33%)                                    | France (11%)        | Italy (10%)        |

**Table S4.** Organic (org) producer prices and yields relative to conventional (con) systems across all crops and for FAO crop groups.

| Crop group            | Price           |           |      | Yield         |           |      |
|-----------------------|-----------------|-----------|------|---------------|-----------|------|
|                       | Organic premium | 95% CI    | n    | Org:con yield | 95% CI    | n    |
| All crops             | 1.37            | 1.30–1.43 | 2459 | 0.80          | 0.76–0.84 | 1071 |
| Fruit & nuts          | 1.18            | 1.14–1.22 | 658  | 0.88          | 0.79–0.98 | 52   |
| Cereals               | 1.37            | 1.24–1.50 | 219  | 0.75          | 0.70–0.80 | 573  |
| Spices & stimulants   | 1.63            | 1.46–1.80 | 896  | 0.85          | 0.69–1.04 | 20   |
| Oil crops             | 1.05            | 0.97–1.12 | 144  | 0.83          | 0.72–0.95 | 119  |
| Vegetables            | 1.23            | 1.19–1.27 | 455  | 0.83          | 0.74–0.94 | 242  |
| Edible roots & tubers | 1.21            | 1.08–1.34 | 17   | 0.77          | 0.61–0.97 | 28   |
| Sugar crops           | 1.30            | 1.12–1.48 | 10   | 0.78          | 0.59–1.04 | 4    |
| Pulses                | 1.42            | 1.22–1.63 | 60   | 0.85          | 0.76–0.96 | 17   |

**Table S5.** Effect sizes and 95% confidence intervals from our meta-analysis compared with estimates from de la Cruz, et al. <sup>1</sup>.

| FAO group           | Our meta-regression | de la Cruz, et al. <sup>1</sup> |
|---------------------|---------------------|---------------------------------|
| All crops           | 0.80 (0.76–0.84)    | 0.83 (0.77–0.89)                |
| Cereals             | 0.75 (0.70–0.80)    | 0.82 (0.76–0.90)                |
| Fruit & nuts        | 0.88 (0.79–0.98)    | 1.02 (0.75–1.39)                |
| Vegetables          | 0.83 (0.74–0.95)    | 0.85 (0.76–0.94)                |
| Pulses              | 0.85 (0.76–0.96)    | 0.75 (0.62–0.90)                |
| Oil crops           | 0.83 (0.72–0.95)    | 0.84 (0.76–0.94)                |
| Spices & stimulants | 0.85 (0.69–1.04)    | 0.49 (0.26–0.92)                |

The main differences between our meta-analysis and that of de la Cruz, et al. <sup>1</sup> can be attributed to dataset composition. de la Cruz, et al. <sup>1</sup> used a subsample of the data compiled by Ponisio, et al. <sup>2</sup>, included studies from Badgley, et al. <sup>3</sup> that were excluded in Ponisio, et al. <sup>2</sup> due to concerns about the validity of comparisons between organic and conventional systems<sup>4</sup>, and incorporated 13 more recent studies not included in previous meta-analyses. Although some effect sizes differed between the two analyses, these differences were generally small, and there is no clear evidence to suggest that either set of estimates is more accurate. The larger divergence observed for spices and stimulants is likely driven by the sample size differences, where de la Cruz, et al. <sup>1</sup> included only three observations for these groups, while we included 20.

## References

- de la Cruz, V. Y. V., Tantriani, Cheng, W. & Tawaraya, K. Yield gap between organic and conventional farming systems across climate types and sub-types: A meta-analysis. *Agricultural Systems* **211**, 103732 (2023).  
<https://doi.org/https://doi.org/10.1016/j.agsy.2023.103732>
- Ponisio, L. C. et al. Diversification practices reduce organic to conventional yield gap. *Proceedings of the Royal Society B: Biological Sciences* **282**, 20141396 (2015).  
<https://doi.org/doi:10.1098/rspb.2014.1396>
- Badgley, C. et al. Organic agriculture and the global food supply. *Renewable Agriculture and Food Systems* **22**, 86-108 (2007).  
<https://doi.org/10.1017/S1742170507001640>
- Connor, D. J. Organic agriculture cannot feed the world. *Field Crops Research* **106**, 187-190 (2008). <https://doi.org/https://doi.org/10.1016/j.fcr.2007.11.010>
